# Supplementary material for: Stable room temperature magnetic ordering and excellent catalytic activity of mechanically activated high surface area nanosized Ni0.45Zn0.55Fe2O4
Source: Royal Society of Chemistry journal article supplement (doi:10.1039/c5ra14773e), 2015-01-01
Supplement: c5ra14773e1.pdf [file c5ra14773e1.pdf]

Stable room temperature magnetic ordering and excellent catalytic activity of mechanically activated high surface area nanosized  $\text{Ni}_{0.45}\text{Zn}_{0.55}\text{Fe}_2\text{O}_4$

S. Dey,<sup>1</sup> R. Gomes,<sup>2</sup> R. Mondal,<sup>1</sup> S. K. Dey,<sup>1</sup> P. Dasgupta,<sup>3</sup> A. Poddar,<sup>3</sup> V. R. Reddy,<sup>4</sup> A. Bhaumik,<sup>2,\*</sup> and S. Kumar<sup>1,\*</sup>

<sup>1</sup>*Department of Physics, Jadavpur University, Kolkata-700 032, India.*

<sup>2</sup>*Department of Materials Science, Indian Association for the Cultivation of Science, Kolkata-700 032, India.*

<sup>3</sup>*Saha Institute of Nuclear Physics, 1/AF Bidhannagar, Kolkata-700064, India*

<sup>4</sup>*UGC-DAE CSR, University Campus, Khandwa Road, Indore-452001, India*

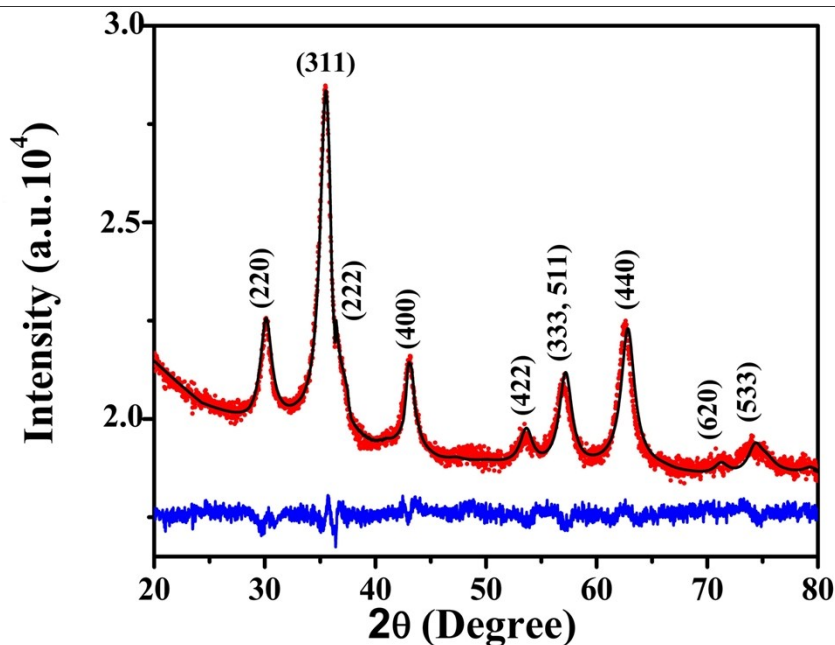

**Fig. S1** The Rietveld refinement plot of the sample using MAUD2.33, showing the difference (blue color line) between the experimental (red color symbol) and the simulated pattern (black color line).

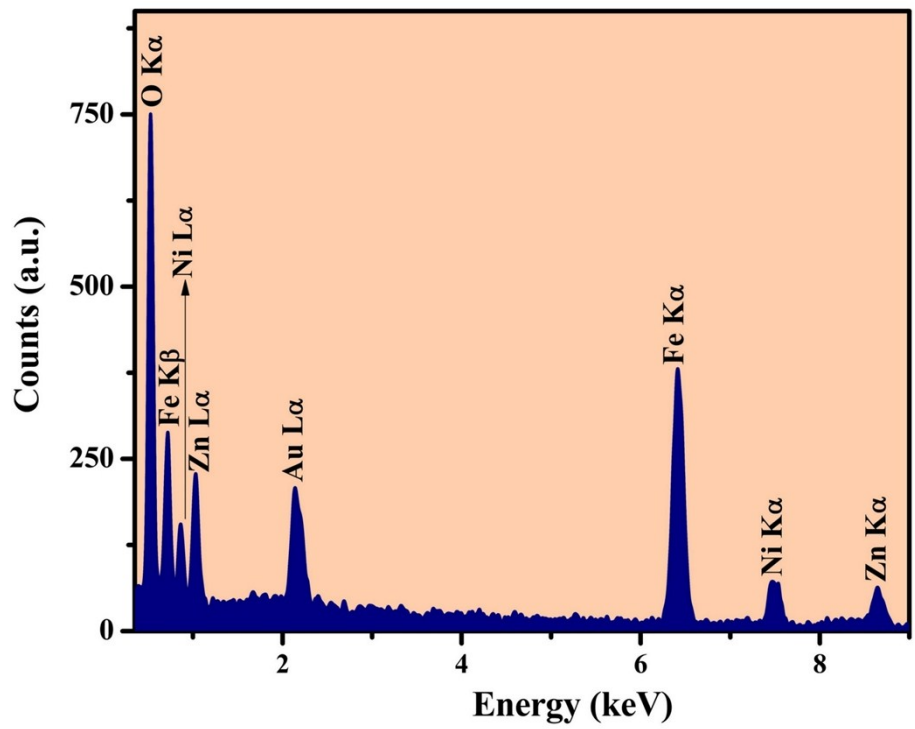

Fig. S2 Energy dispersive x-ray spectrum of the sample.

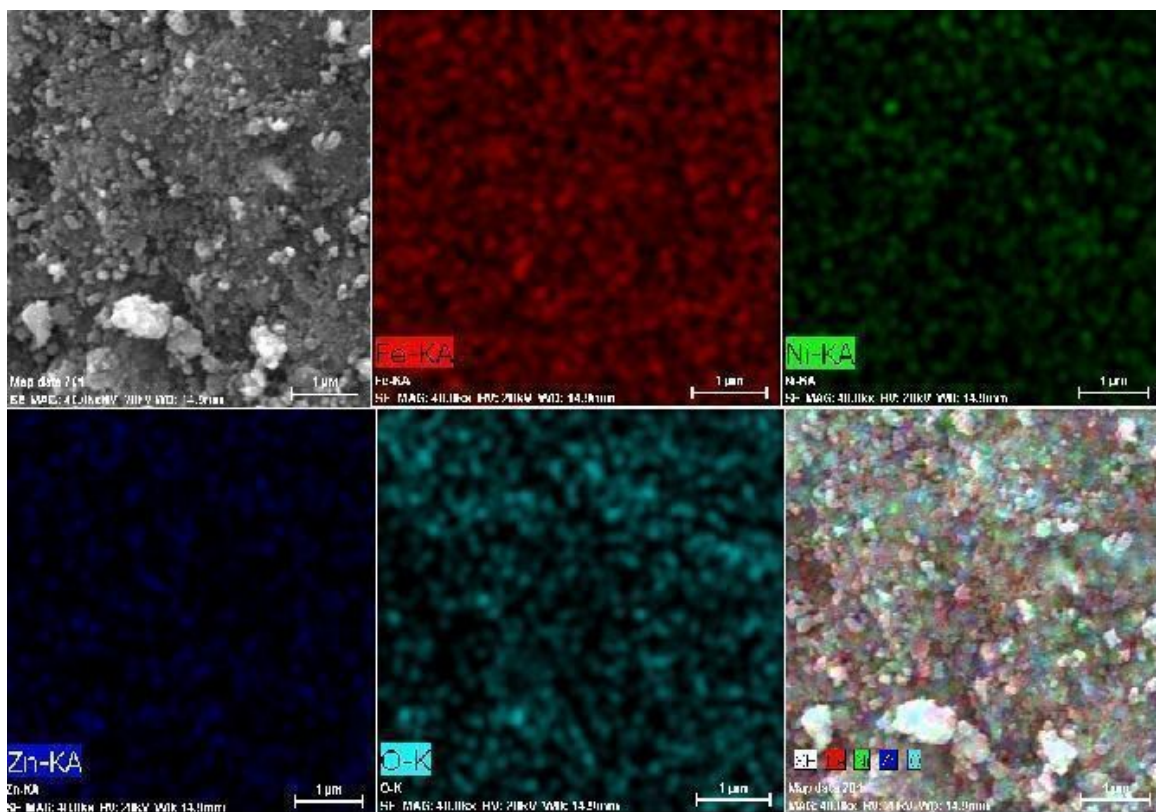

Fig. S3 Elemental mapping showing the presence of all constituent elements.

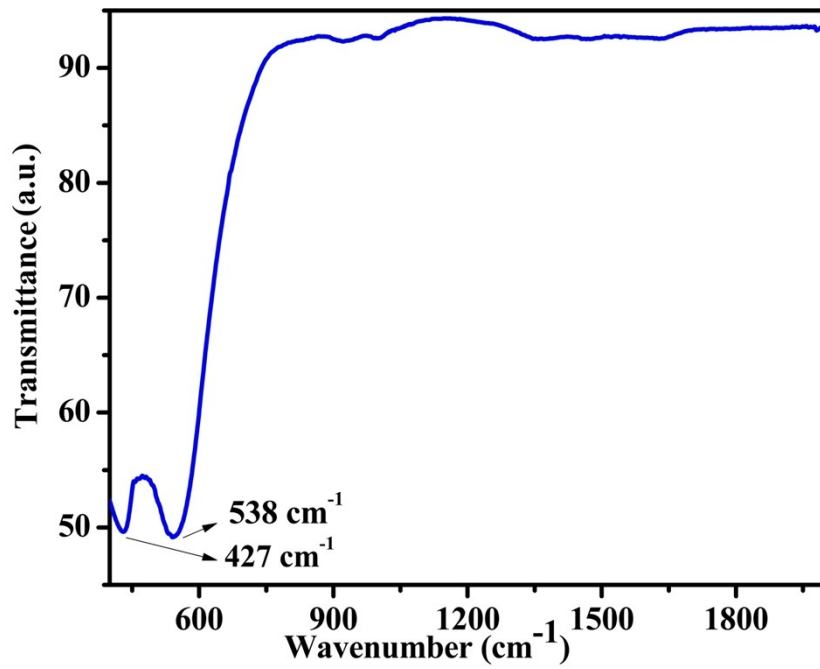

Fig. S4 FTIR spectrum of the sample.
